# Supplementary material for: Investigating the genetic architecture of eye colour in a Canadian cohort
Source: PubMed Central journal article supplement (PMC9194134; doi:10.1016/j.isci.2022.104485), 2022-05-30
Supplement: mmc1.pdf [file mmc1.pdf]

iScience, Volume 25

## **Supplemental information**

### **Investigating the genetic architecture of eye colour in a Canadian cohort**

**Frida Lona-Durazo, Rohit Thakur, Erola Pairo-Castineira, Karen Funderburk, Tongwu Zhang, Michael A. Kovacs, Jiyeon Choi, Ian J. Jackson, Kevin M. Brown, and Esteban J. Parra**

## Supplementary Tables

**Table S1.** Allele frequency across provinces in the CanPath for the rs12913832 *HERC2* variant, Related STAR Methods. QC = Quebec; ATL = Atlantic Provinces; ATP = Alberta; BC = British Columbia; ON = Ontario; all-noQC = all provinces, excluding Quebec.

|                 | A_allele | G_allele |
|-----------------|----------|----------|
| <b>QC</b>       | 0.373    | 0.627    |
| <b>ATL</b>      | 0.232    | 0.768    |
| <b>ATP</b>      | 0.227    | 0.773    |
| <b>BC</b>       | 0.237    | 0.763    |
| <b>ON</b>       | 0.242    | 0.758    |
| <b>all-noQC</b> | 0.235    | 0.765    |

**Table S2.** Number of individuals included on each eye colour category, by genotyping array and combined in the meta-analyses, Related to STAR Methods.

| Eye Colour         | Axiom UKBB | Illumina GSA | Meta-Analysis |
|--------------------|------------|--------------|---------------|
| <b>Blue + grey</b> | 1,371      | 758          | 2,129         |
| <b>Green</b>       | 481        | 569          | 1,050         |
| <b>Hazel</b>       | 665        | 547          | 1,212         |
| <b>Brown</b>       | 695        | 555          | 1,250         |
| <b>Total</b>       | 3,212      | 2,429        | 5,641         |

**Table S3.** Conditional and Joint Analysis of Association (GCTA-COJO) results of eye colour, in which LD was calculated using the Axiom UKBB genotyping array, Related to STAR Methods. Position= chromosomal position (hg19); AF= allele frequency; SE= standard error; FE= fixed effects model; RE2= random effects model; LD: linkage disequilibrium with the SNP in the line below; I<sup>2</sup>= heterogeneity measure, where I<sup>2</sup> > 50 is considered as notable heterogeneity.

| chromosome | rsid        | position | Ref Allele | Ref AF | beta  | SE   | p-value (FE) | p-value (RE2) | beta_joint | se_joint | p-value_joint | Nearest Gene   | LD (r <sup>2</sup> ) | I <sup>2</sup> | Cochran's Q | Cochran's Q p-value |
|------------|-------------|----------|------------|--------|-------|------|--------------|---------------|------------|----------|---------------|----------------|----------------------|----------------|-------------|---------------------|
| 6          | rs12203592  | 396321   | T          | 0.17   | -0.16 | 0.03 | 8.80E-09     | 1.24E-08      | -0.16      | 0.03     | 9.67E-09      | <i>IRF4</i>    | 0.0                  | 23.04          | 1.30        | 0.25                |
| 6          | rs116072038 | 34650865 | G          | 0.02   | -0.44 | 0.08 | 1.46E-08     | 2.07E-08      | -0.44      | 0.08     | 1.62E-08      | <i>ILRUN</i>   | 0.0                  | 0.00           | 0.71        | 0.40                |
| 9          | rs1326779   | 12737581 | C          | 0.30   | 0.14  | 0.02 | 4.74E-09     | 6.79E-09      | 0.14       | 0.02     | 5.26E-09      | <i>TYRP1</i>   | 0.0                  | 52.20          | 2.09        | 0.15                |
| 11         | rs1126809   | 89017961 | A          | 0.28   | -0.14 | 0.02 | 3.13E-08     | 3.96E-08      | -0.14      | 0.02     | 3.41E-08      | <i>TYR</i>     | 0.0                  | 0.00           | 0.04        | 0.85                |
| 14         | rs4144266   | 92789205 | G          | 0.44   | -0.12 | 0.02 | 1.94E-08     | 2.34E-08      | -0.12      | 0.02     | 2.12E-08      | <i>SLC24A4</i> | 0.0                  | 69.55          | 3.28        | 0.07                |
| 15         | rs4778138   | 28335820 | G          | 0.13   | 0.81  | 0.03 | 2.89E-164    | 1.71E-163     | 0.32       | 0.04     | 1.16E-16      | <i>OCA2</i>    | 0.2                  | 0.00           | 0.30        | 0.58                |
| 15         | rs1129038   | 28356859 | T          | 0.76   | -1.24 | 0.02 | 0            | 0             | -0.76      | 0.04     | 1.98E-81      | <i>HERC2</i>   | 0.1                  | 95.14          | 20.56       | 5.77E-06            |
| 15         | rs79380392  | 28409219 | T          | 0.02   | 1.11  | 0.08 | 8.37E-49     | 6.57E-49      | 0.62       | 0.08     | 8.97E-14      | <i>HERC2</i>   | 0.0                  | 86.70          | 7.52        | 0.01                |
| 15         | rs72714147  | 28478799 | A          | 0.08   | 0.84  | 0.04 | 4.41E-110    | 3.39E-112     | 0.52       | 0.05     | 7.98E-31      | <i>HERC2</i>   | 0.0                  | 94.86          | 19.45       | 1.03E-05            |
| 15         | rs117744568 | 28498692 | A          | 0.02   | 0.87  | 0.06 | 1.09E-45     | 2.70E-45      | 0.73       | 0.06     | 2.31E-30      | <i>HERC2</i>   | 0.0                  | 74.88          | 3.98        | 0.05                |
| 15         | rs10162958  | 28507825 | G          | 0.05   | 0.95  | 0.04 | 4.45E-105    | 2.15E-105     | 0.49       | 0.05     | 2.03E-20      | <i>HERC2</i>   | 0.0                  | 89.78          | 9.78        | 1.76E-03            |

**Table S4.** Conditional and Joint Analysis of Association (GCTA-COJO) of eye colour, in which LD was calculated using the Illumina GSA array, Related to STAR Methods. Position= chromosomal position (hg19); AF= allele frequency; SE= standard error; FE= fixed effects model; LD: linkage disequilibrium with the SNP in the line below. Related to Results.

| chromosome | rsid        | position | Ref Allele | Ref AF | beta  | SE   | p-value (FE) | beta_joint | se_joint | p-value_joint | Nearest Gene | LD (r <sup>2</sup> ) |
|------------|-------------|----------|------------|--------|-------|------|--------------|------------|----------|---------------|--------------|----------------------|
| 6          | rs12203592  | 396321   | T          | 0.17   | -0.17 | 0.03 | 8.80E-09     | -0.17      | 0.03     | 9.67E-09      | IRF4         | 0                    |
| 6          | rs116072038 | 34650865 | G          | 0.02   | -0.44 | 0.08 | 1.33E-08     | -0.44      | 0.08     | 1.46E-08      | ILRUN        | 0                    |
| 9          | rs1326779   | 12737581 | C          | 0.3    | 0.14  | 0.02 | 4.74E-09     | 0.14       | 0.02     | 5.26E-09      | TYRP1        | 0                    |
| 11         | rs1126809   | 89017961 | A          | 0.28   | -0.14 | 0.03 | 3.13E-08     | -0.14      | 0.03     | 3.41E-08      | TYR          | 0                    |
| 14         | rs4144266   | 92789205 | G          | 0.44   | -0.12 | 0.02 | 1.94E-08     | -0.12      | 0.02     | 2.12E-08      | SLC24A4      | 0                    |
| 15         | rs4778239   | 28337939 | T          | 0.99   | -0.94 | 0.1  | 2.72E-21     | -0.78      | 0.1      | 1.59E-14      | OCA2         | 0.02                 |
| 15         | rs1129038   | 28356859 | T          | 0.76   | -1.24 | 0.02 | 0            | -0.69      | 0.04     | 1.17E-70      | HERC2        | 0.03                 |
| 15         | rs116879078 | 28363488 | T          | 0.01   | 0.88  | 0.1  | 3.73E-18     | 0.84       | 0.1      | 8.22E-16      | HERC2        | 0                    |
| 15         | rs79380392  | 28409219 | T          | 0.02   | 1.11  | 0.08 | 8.37E-49     | 1.01       | 0.08     | 1.89E-36      | HERC2        | 0                    |
| 15         | rs72714147  | 28478799 | A          | 0.08   | 0.84  | 0.04 | 4.41E-110    | 0.67       | 0.05     | 5.39E-51      | HERC2        | 0.01                 |
| 15         | rs8028689   | 28488888 | C          | 0.06   | 0.96  | 0.04 | 1.71E-118    | 0.81       | 0.05     | 8.77E-64      | HERC2        | 0                    |
| 15         | rs117744568 | 28498692 | A          | 0.02   | 0.87  | 0.06 | 1.09E-45     | 0.82       | 0.07     | 2.60E-36      | HERC2        | 0                    |

**Table S5.** Nominally significant SNPs replicated from the independent signals identified by Simcoe *et al.* 2021, Related to Results.

| Simcoe et al. 2021 |           |             |              |            |        |        |       | CanPath (this study) |    |     |           |       |          | Concordance |                |             |                     |
|--------------------|-----------|-------------|--------------|------------|--------|--------|-------|----------------------|----|-----|-----------|-------|----------|-------------|----------------|-------------|---------------------|
| chromosome         | position  | rsid        | Nearest Gene | Ref Allele | Ref AF | Beta   | SE    | p-value              | EA | NEA | beta (FE) | SE    | p-value  |             | I <sup>2</sup> | Cochran's Q | Cochran's Q p-value |
| 1                  | 212421629 | rs351385    | DTL          | G          | 0.580  | -0.083 | 0.008 | 2.31E-28             | G  | A   | -0.049    | 0.022 | 0.027    | 35.154      | 1.542          | 0.214       | Yes                 |
| 2                  | 219755011 | rs121908120 | WNT10A       | T          | 0.976  | 0.140  | 0.025 | 1.54E-08             | A  | T   | -0.178    | 0.079 | 0.025    | 0.000       | 0.732          | 0.392       | Yes                 |
| 2                  | 239276278 | rs74409360  | TRAF3IP1     | T          | 0.076  | -0.128 | 0.014 | 8.09E-20             | T  | C   | -0.096    | 0.040 | 0.017    | 0.000       | 0.695          | 0.404       | Yes                 |
| 3                  | 69980177  | rs116359091 | MITF         | G          | 0.974  | -0.229 | 0.025 | 1.02E-20             | A  | G   | 0.231     | 0.073 | 0.002    | 0.000       | 0.424          | 0.515       | Yes                 |
| 5                  | 311902    | rs62330021  | PDC06,AHRR   | G          | 0.948  | -0.325 | 0.017 | 1.36E-80             | A  | G   | 0.117     | 0.053 | 0.026    | 0.000       | 0.007          | 0.931       | Yes                 |
| 5                  | 148206885 | rs1800888   | ADRB2        | T          | 0.013  | -0.229 | 0.033 | 5.20E-12             | T  | C   | -0.240    | 0.082 | 0.003    | 0.000       | 0.073          | 0.786       | Yes                 |
| 6                  | 396321    | rs12203592  | IRF4         | T          | 0.171  | -0.385 | 0.010 | 1.61E-321            | T  | C   | -0.166    | 0.029 | 6.39E-09 | 13.740      | 1.159          | 0.282       | Yes                 |
| 6                  | 10538183  | rs6910861   | GCNT2        | G          | 0.461  | 0.078  | 0.008 | 1.20E-24             | G  | A   | 0.056     | 0.022 | 0.010    | 0.000       | 0.000          | 0.997       | Yes                 |
| 9                  | 12677471  | rs13297008  | TYRP1        | G          | 0.388  | 0.260  | 0.008 | 4.99E-250            | A  | G   | -0.128    | 0.022 | 8.76E-09 | 0.000       | 0.698          | 0.404       | Yes                 |
| 9                  | 12679244  | rs62538956  | TYRP1        | T          | 0.882  | -0.282 | 0.012 | 5.43E-130            | C  | T   | 0.147     | 0.035 | 2.04E-05 | 0.000       | 0.021          | 0.886       | Yes                 |
| 11                 | 88902144  | rs10830237  | TYR          | T          | 0.590  | -0.102 | 0.008 | 3.27E-41             | T  | C   | 0.044     | 0.022 | 0.045    | 0.000       | 0.231          | 0.631       | Yes                 |
| 11                 | 89017961  | rs1126809   | TYR          | G          | 0.721  | 0.285  | 0.008 | 1.82E-255            | A  | G   | -0.136    | 0.025 | 3.17E-08 | 0.000       | 0.016          | 0.900       | Yes                 |
| 15                 | 27900576  | rs34422827  | OCA2         | T          | 0.468  | -0.138 | 0.008 | 1.29E-75             | G  | T   | 0.070     | 0.022 | 0.001    | 0.000       | 0.017          | 0.896       | Yes                 |
| 15                 | 28198772  | rs117616283 | OCA2         | G          | 0.976  | -1.639 | 0.033 | <1E-330              | A  | G   | 0.357     | 0.063 | 1.21E-08 | 58.909      | 2.434          | 0.119       | Yes                 |
| 15                 | 28241020  | rs4778224   | OCA2         | G          | 0.786  | -0.282 | 0.010 | 8.18E-162            | G  | A   | -0.159    | 0.029 | 5.13E-08 | 75.296      | 4.048          | 0.044       | Yes                 |
| 15                 | 28288121  | rs1470608   | OCA2         | T          | 0.151  | 0.962  | 0.010 | <1E-330              | T  | G   | 0.495     | 0.030 | 1.89E-59 | 70.954      | 3.443          | 0.064       | Yes                 |
| 15                 | 28329346  | rs151090307 | OCA2         | T          | 0.022  | -0.895 | 0.033 | 6.20E-164            | T  | C   | -0.605    | 0.128 | 2.20E-06 | 0.000       | 0.120          | 0.729       | Yes                 |
| 15                 | 28330373  | rs77542847  | OCA2         | C          | 0.922  | -1.594 | 0.014 | <1E-330              | A  | C   | 0.726     | 0.039 | 1.86E-77 | 94.077      | 16.882         | 0.000       | Yes                 |
| 15                 | 28333189  | rs76415938  | OCA2         | T          | 0.034  | 1.589  | 0.021 | <1E-330              | T  | C   | 0.715     | 0.054 | 7.62E-40 | 0.000       | 0.318          | 0.573       | Yes                 |
| 15                 | 28337939  | rs4778239   | OCA2         | T          | 0.985  | -2.115 | 0.034 | <1E-330              | T  | C   | -0.939    | 0.100 | 4.14E-21 | 76.997      | 4.347          | 0.037       | Yes                 |
| 15                 | 28342069  | rs8026089   | OCA2         | C          | 0.967  | -1.571 | 0.021 | <1E-330              | A  | C   | 0.935     | 0.068 | 1.04E-42 | 87.119      | 7.764          | 0.005       | Yes                 |
| 15                 | 28356859  | rs1129038   | HERC2        | T          | 0.734  | -2.605 | 0.006 | <1E-330              | T  | C   | -1.233    | 0.024 | 0        | 95.244      | 21.026         | 0.000       | Yes                 |
| 15                 | 28358104  | rs77854840  | HERC2        | G          | 0.976  | -2.256 | 0.026 | <1E-330              | A  | G   | 1.043     | 0.070 | 1.02E-50 | 86.267      | 7.282          | 0.007       | Yes                 |
| 15                 | 28384534  | rs150287021 | HERC2        | T          | 0.012  | 2.626  | 0.041 | <1E-330              | T  | C   | 0.949     | 0.158 | 2.01E-09 | 67.386      | 3.066          | 0.000       | Yes                 |
| 15                 | 28530182  | rs1667394   | HERC2        | T          | 0.822  | -2.244 | 0.008 | <1E-330              | T  | C   | -1.037    | 0.027 | 0        | 95.081      | 20.329         | 0.000       | Yes                 |
| 21                 | 44783957  | rs619484    | SIK1         | G          | 0.634  | -0.113 | 0.008 | 4.18E-48             | A  | G   | 0.051     | 0.023 | 0.023    | 70.468      | 3.386          | 0.066       | Yes                 |

**Table S6.** TWAS results showing the genome-wide significant genes in the TWAS (p-value ≤ 1.25e-5), Related to STAR Methods. GWAS/eQTL best SNP is the most significant SNP on each analysis. \* = signals are not independent from each other, as evidenced by conditional TWAS.

| Gene     | Chromosome | GWAS best SNP | GWAS Z-score | eQTL best SNP | eQTL Z-score | # of SNPs | # weighted SNPs | TWAS Z-score | TWAS p-value |
|----------|------------|---------------|--------------|---------------|--------------|-----------|-----------------|--------------|--------------|
| RIN3*    | 14         | rs12896399    | -5.56        | rs12893289    | -6.14        | 986       | 4               | 5.189        | 2.12E-07     |
| SLC24A4* | 14         | rs12896399    | -5.56        | rs61977801    | -6.68        | 933       | 11              | 5.287        | 1.24E-07     |
| OCA2     | 15         | rs12913832    | 53.28        | rs12913832    | 6.24         | 489       | 1               | 53.279       | 0            |

**Table S7.** Statistical interactions results across all the top GWAS SNPs that reached a genome-wide significance threshold (*IRF4*: rs12203592, *TYRP1*: rs1326779; *TYR*: rs1126809; *SLC24A4*: rs4144266), and including also the five loci fine mapped in the *OCA2/HERC2* region (rs4778138, rs12913832, rs117007668, rs117744568, rs71467328), Related to STAR Methods.

| SNP1        | SNP2        | beta   | SE    | pvalue |
|-------------|-------------|--------|-------|--------|
| rs12203592  | rs1326779   | -0.161 | 0.137 | 0.241  |
| rs12203592  | rs1126809   | -0.039 | 0.139 | 0.777  |
| rs12203592  | rs4144266   | -0.131 | 0.129 | 0.310  |
| rs12203592  | rs4778138   | -0.074 | 0.176 | 0.674  |
| rs12203592  | rs12913832  | -0.013 | 0.139 | 0.925  |
| rs12203592  | rs117007668 | -0.101 | 0.394 | 0.798  |
| rs12203592  | rs71467328  | 0.603  | 0.322 | 0.061  |
| rs1326779   | rs1126809   | -0.024 | 0.116 | 0.835  |
| rs1326779   | rs4144266   | 0.068  | 0.106 | 0.524  |
| rs1326779   | rs117007668 | 0.125  | 0.324 | 0.700  |
| rs1326779   | rs117744568 | -0.055 | 0.295 | 0.853  |
| rs1326779   | rs71467328  | 0.253  | 0.259 | 0.329  |
| rs1126809   | rs4144266   | -0.113 | 0.111 | 0.306  |
| rs1126809   | rs4778138   | -0.031 | 0.151 | 0.838  |
| rs1126809   | rs12913832  | 0.212  | 0.118 | 0.072  |
| rs1126809   | rs117007668 | 0.407  | 0.334 | 0.223  |
| rs1126809   | rs117744568 | 0.424  | 0.310 | 0.172  |
| rs1126809   | rs71467328  | 0.338  | 0.289 | 0.243  |
| rs4144266   | rs4778138   | 0.265  | 0.134 | 0.047  |
| rs4144266   | rs12913832  | 0.261  | 0.106 | 0.014  |
| rs4144266   | rs117007668 | 0.467  | 0.295 | 0.113  |
| rs4144266   | rs117744568 | 0.412  | 0.272 | 0.129  |
| rs4144266   | rs71467328  | -0.052 | 0.243 | 0.831  |
| rs4778138   | rs12913832  | -0.204 | 0.141 | 0.148  |
| rs4778138   | rs117007668 | 0.304  | 0.508 | 0.550  |
| rs4778138   | rs117744568 | 0.608  | 0.476 | 0.202  |
| rs4778138   | rs71467328  | -0.401 | 0.336 | 0.232  |
| rs12913832  | rs117007668 | -0.701 | 0.428 | 0.102  |
| rs12913832  | rs117744568 | -0.617 | 0.349 | 0.078  |
| rs12913832  | rs71467328  | -0.002 | 0.376 | 0.995  |
| rs117007668 | rs117744568 | 0.140  | 0.761 | 0.854  |
| rs117007668 | rs71467328  | -1.878 | 1.084 | 0.083  |
| rs117744568 | rs71467328  | -1.380 | 0.981 | 0.160  |

**Table S8.** Contingency table of the distribution of observed and expected brown vs. non-brown eye colour individuals with respect to the *IRF4* rs12203592 and *HERC2* rs12913832 genotypes, Related to STAR Methods. P-values were calculated using a Fisher's exact test.

| <i>HERC2:IRF4</i> | brown    |          | non-brown |          | p-value  |
|-------------------|----------|----------|-----------|----------|----------|
|                   | observed | expected | observed  | expected |          |
| <b>AA:CC</b>      | 255      | 243      | 134       | 146      | 0.019    |
| <b>AA:TC</b>      | 81       | 89       | 62        | 54       |          |
| <b>AA:TT</b>      | 5        | 9        | 9         | 5        |          |
| <b>AG:CC</b>      | 693      | 621      | 846       | 918      | 2.20E-16 |
| <b>AG:TC</b>      | 191      | 233      | 387       | 345      |          |
| <b>AG:TT</b>      | 4        | 33       | 78        | 49       |          |
| <b>GG:CC</b>      | 15       | 15       | 2006      | 2006     | 0.749    |
| <b>GG:TC</b>      | 5        | 6        | 769       | 768      |          |
| <b>GG:TT</b>      | 1        | 1        | 100       | 100      |          |

**Table S9.** Contingency table of the distribution of observed and expected blue vs. non-blue eye colour individuals with respect to the *IRF4* rs12203592 and *HERC2* rs12913832 genotypes, Related to STAR Methods. P-values were calculated using a Fisher's exact test.

| <i>HERC2:IRF4</i> | blue     |          | non-blue |          | p-value  |
|-------------------|----------|----------|----------|----------|----------|
|                   | observed | expected | observed | expected |          |
| <b>AA:CC</b>      | 4        | 4        | 385      | 385      | 0.711    |
| <b>AA:TC</b>      | 2        | 2        | 141      | 141      |          |
| <b>AA:TT</b>      | 0        | 0        | 14       | 14       |          |
| <b>AG:CC</b>      | 71       | 92       | 1468     | 1447     | 1.22E-07 |
| <b>AG:TC</b>      | 42       | 34       | 536      | 544      |          |
| <b>AG:TT</b>      | 18       | 5        | 64       | 77       |          |
| <b>GG:CC</b>      | 1361     | 1390     | 660      | 631      | 0.025    |
| <b>GG:TC</b>      | 554      | 532      | 220      | 242      |          |
| <b>GG:TT</b>      | 77       | 69       | 24       | 32       |          |

### Supplementary Figures

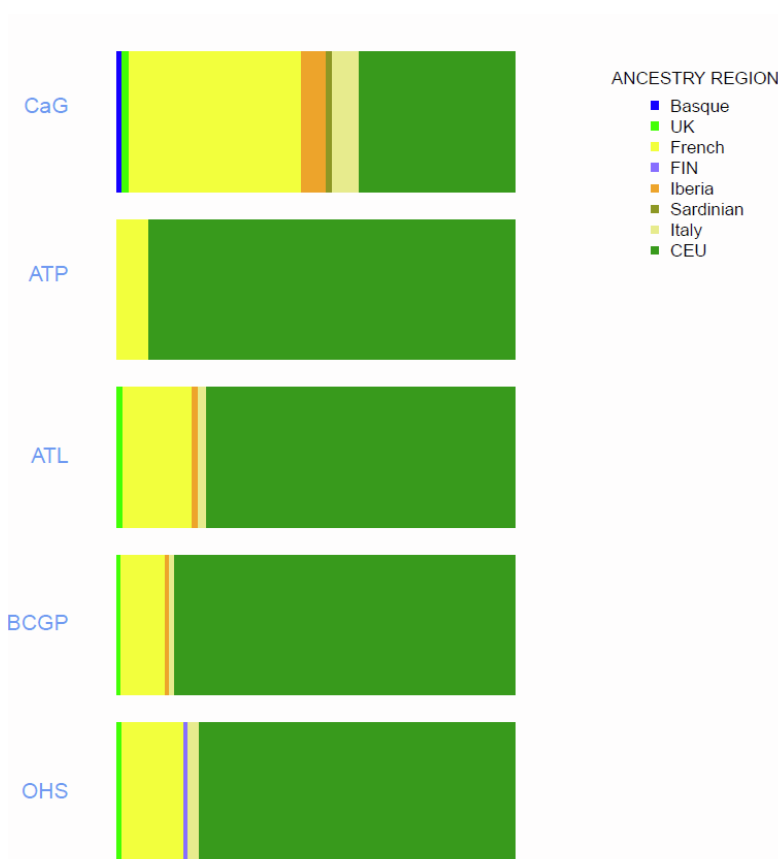

**Figure S1.** Ancestry proportions estimated from Chromopainter for each Canadian province, using as source the populations from the 1000 Genomes Project Phase 3 and Human Genome Diversity Project, Related to STAR Methods. ATL = Atlantic Provinces; ATP = Alberta; BCGP= British Columbia; CaG= Quebec, OHS= Ontario.

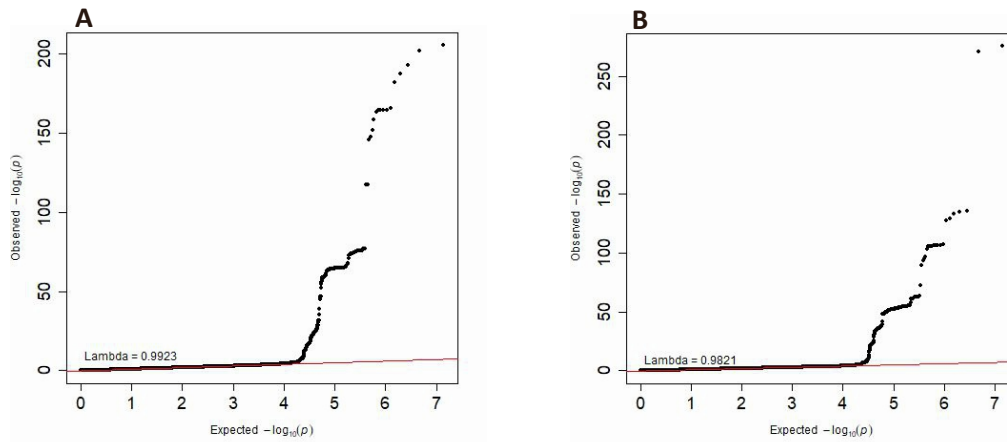

**Figure S2.** Q-Q plots ( $-\log_{10}$  p-values) of each cohort for the GWAS showing the genomic inflation factor (lambda  $\lambda$ ), Related to STAR Methods. **A.** Axiom UKBB array ( $\lambda = 0.9923$ ). **B.** GSA Array (lambda = 0.9821).

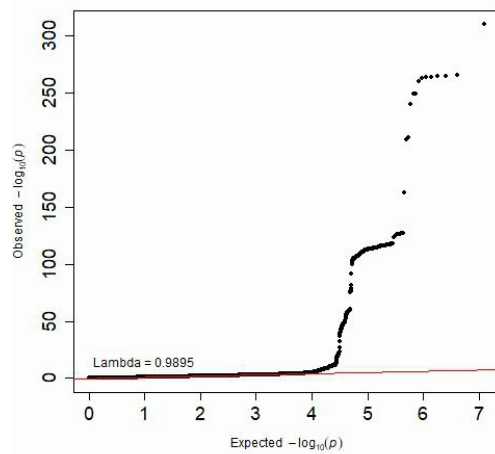

**Figure S3.** Q-Q plot ( $-\log_{10}$  p-values) of meta-analysis showing the genomic inflation factor ( $\lambda = 0.9895$ ), Related to Figure 2.

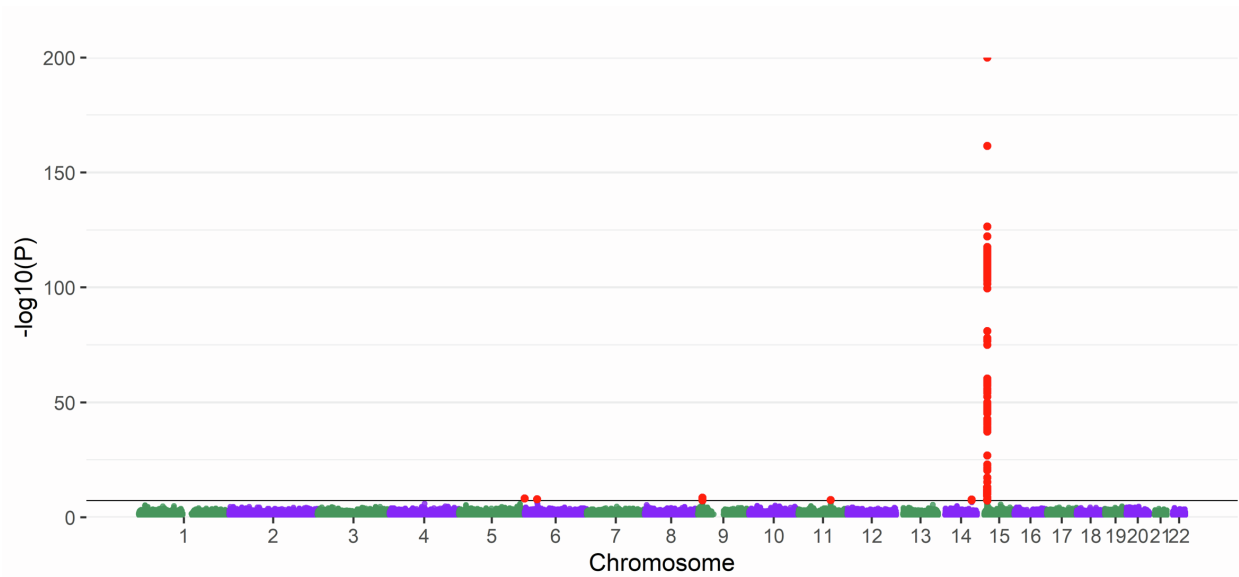

**Figure S4.** Manhattan plot of eye colour meta-analysis based on a linear mixed model, Related to Figure 2. The continuous line denotes the genome-wide threshold ( $p=5e-8$ ). Markers in red are genome-wide significant.

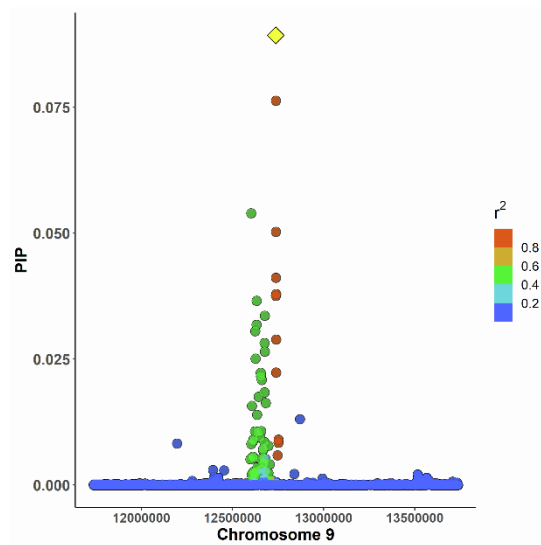

**Figure S5.** FINEMAP regional plot of the *TYRP1* locus (chromosome 9), Related to STAR Methods. The lead SNP (rs13284327) is highlighted in yellow and LD  $r^2$  correlations are shown with respect to the lead SNP. The candidate causal SNPs in the credible set are located upstream and downstream of the gene.



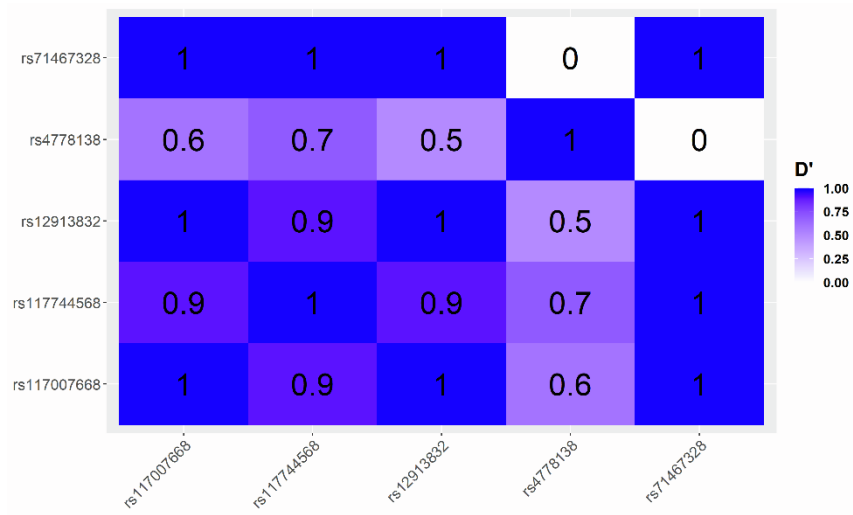

**Figure S6.** Linkage disequilibrium ( $D'$ ) among the fine-mapped candidate causal SNPs in the *HERC2/OCA2* locus (chromosome 15) associated with eye colour, Related to Figure 3.  $D'$  was computed on the European subset of individuals from the 1000 Genomes Project on LDLink.

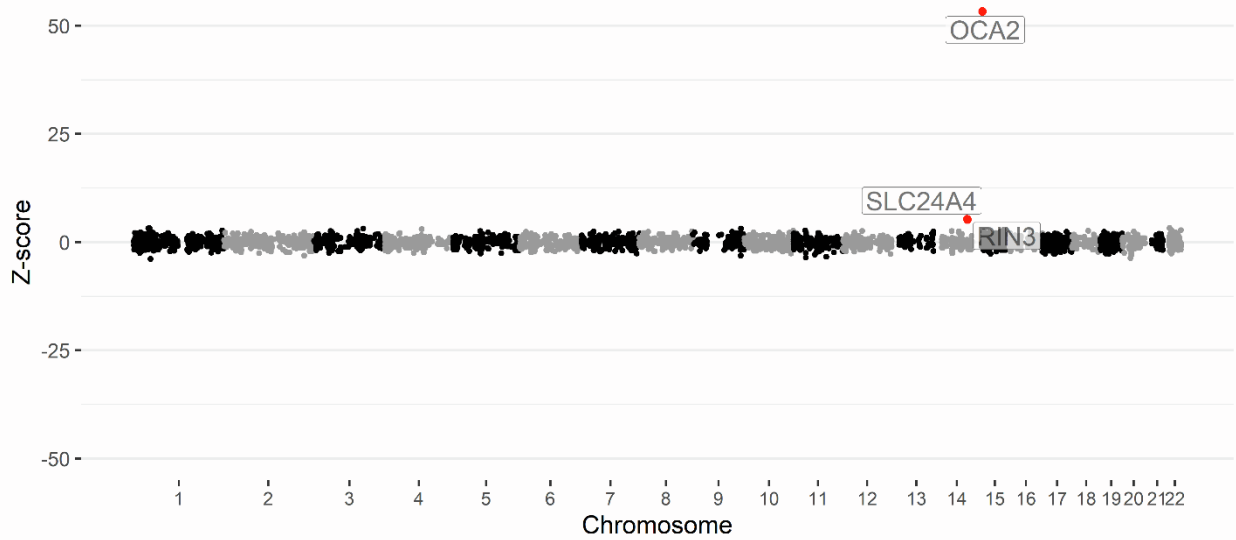

**Figure S7.** Miami plot of the TWAS conducted for eye colour across chromosomes (X-axis) against TWAS Z-scores (Y-axis), Related to STAR Methods. Genes that passed the significance threshold ( $p$ -value  $\leq 1.25e-5$ ) are annotated and highlighted in red.

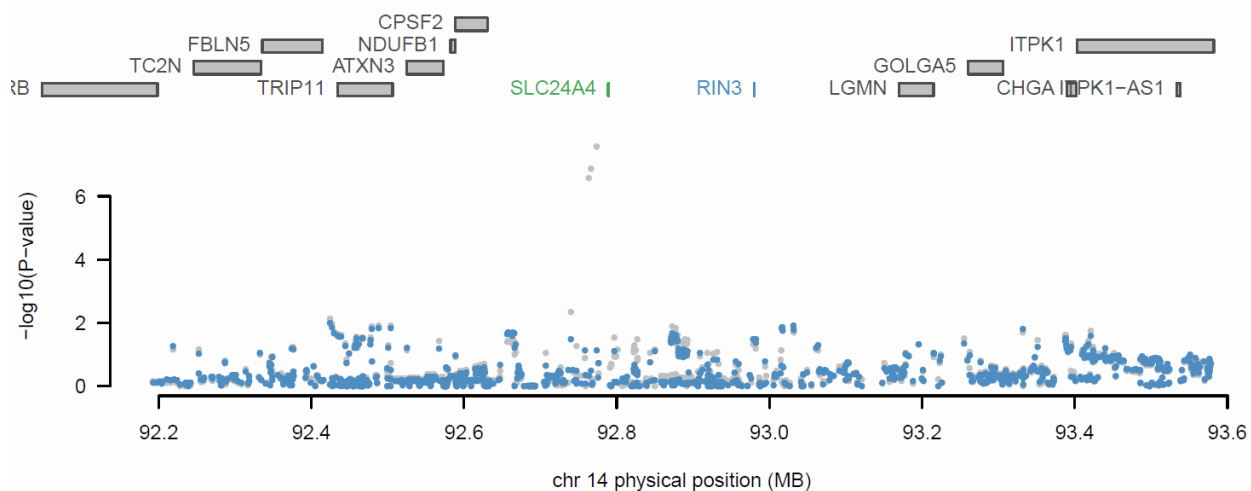

**Figure S8.** Conditional analysis of TWAS analysis of the locus in chromosome 14, Related to STAR Methods. The top section shows all the genes in the locus: *SLC24A4* and *RIN3*, in blue and green respectively, and other genes are annotated in grey (genome version hg19). The bottom section illustrates the GWAS original regional plot in grey, and after conditioning for the predicted expression of *RIN3* in blue. The GWAS signal disappears after the conditional analysis, indicating that the genes *SLC24A4* and *RIN3* are not independent from each other.

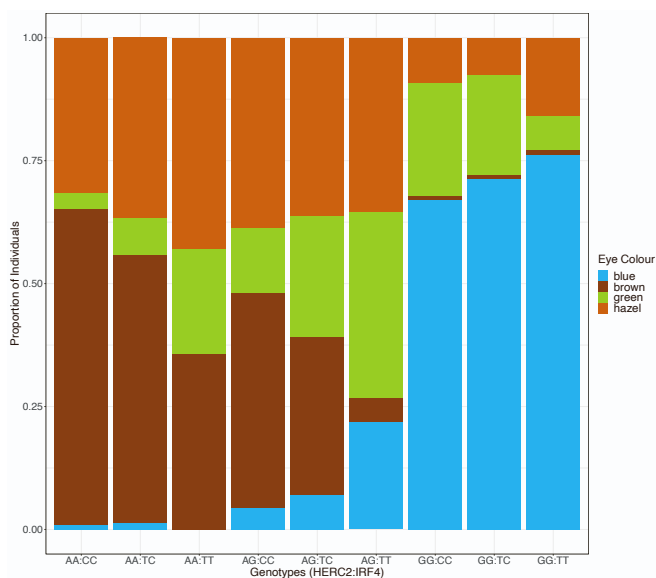

**Figure S9.** Distribution of eye colour categories in the CanPath cohort, with respect to the *HERC2* rs12913832 and *IRF4* rs12203592 genotypes, showing a negative relationship between the number of rs12203592 T-alleles and the proportion of individuals with brown eye colour, which is significant for the rs12913832-AG genotype when comparing brown vs. non-brown eye colour (Fisher's exact test  $p$ -value =  $2.2e-16$ ) or blue vs. non-blue eye colour (Fisher's exact test  $p$ -value =  $1.22e-07$ ), Related to STAR Methods.
